# Supplementary material for: Inhibition of RNA Polymerase III Augments the Anti-Cancer Properties of TNFα
Source: MDPI journal article supplement (doi:10.3390/cancers15051495), 2023-02-27
Supplement: s1 [file s1]

**“Inhibition of RNA polymerase III augments the anti-cancer properties of TNF $\alpha$ ”**

Hitha Gopalan Nair, Aneta Jurkiewicz, Damian Graczyk

Supplementary Table 1. The antibodies used in this study.

| Antibody           | Secondary antibody | Dilution | Incubation time and temperature | Source                    |
|--------------------|--------------------|----------|---------------------------------|---------------------------|
| $\alpha$ -Actin    | mouse              | 1:20,000 | o/n 4°C                         | MAB1501, Sigma-Aldrich    |
| Cyclin D1          | mouse              | 1:1,000  | o/n 4°C                         | sc-8396, Santa Cruz B.    |
| E-cadherin         | mouse              | 1:1,000  | o/n 4°C                         | #14472, Cell Signaling T. |
| Caspase 8          | mouse              | 1:1,000  | o/n 4°C                         | sc-5263, Santa Cruz B.    |
| Caspase 7          | rabbit             | 1:1,000  | o/n 4°C                         | #9492, Cell Signaling T.  |
| PARP               | rabbit             | 1:2,500  | o/n 4°C                         | #9532, Cell Signaling T.  |
| cIAP1              | mouse              | 1:1,000  | o/n 4°C                         | sc-271419, Santa Cruz B.  |
| NF- $\kappa$ B p65 | rabbit             | 1:5,000  | o/n 4°C                         | sc-372, Santa Cruz B.     |
| Histone H3         | rabbit             | 1:10,000 | 15 min R.T.                     | ab1791, Abcam             |

Supplementary Table 2. The tRNA-specific oligonucleotides used for cDNA synthesis.

| Gene name | Sequence (5' $\rightarrow$ 3') |
|-----------|--------------------------------|
| Hs tL     | TGTCAGAAAGTG                   |
| Hs tY     | TCCTTCGAGC                     |
| Hs tT     | GTATTCCTACAG                   |
| Hs tI     | TGCTCCAGGTG                    |
| Hs tM     | TAGCAGAGAGGAT                  |

Supplementary Table 3. The PCR primers used in this study.

| Gene name                | Forward (5' $\rightarrow$ 3') | Reverse (5' $\rightarrow$ 3') |
|--------------------------|-------------------------------|-------------------------------|
| Hs Fibronectin 1         | GCTCATCCGTGGTTGTATCAG         | TTCTTGGTGGGCTGACATTC          |
| Hs tRNA <sup>iMet</sup>  | AGAGTGGCGCAGCGGAAG            | GAGGATGGTTTCGATCCATC          |
| Hs tRNA <sup>Ile10</sup> | CGCGCGGTACTTATATGACA          | CTCCAGGTGAGGATCGAACT          |
| Hs tRNA <sup>Leu27</sup> | GGTCTAAGGCGCTGGATTTAG         | AGTGAGACCTTCTGAGGTGTGG        |
| U6 snRNA                 | GCTTCGGCAGCACATATACTAA        | ATGGAACGCTTCACGAATTT          |
| Hs GAPDH                 | AGGTGAAGGTCGGAGTCAAC          | AATGAAGGGGTCATTGATGG          |
| Hs RPLP0                 | GCGACCTGGAAGTCCAACATA         | TGTCTGCTCCCAATGAAA            |
