# Supplementary material for: Inhibition of RNA Polymerase III Augments the Anti-Cancer Properties of TNFα
Source: MDPI journal article supplement (doi:10.3390/cancers15051495), 2023-02-27
Supplement: s1 [file s1]

## Supplementary Figure S3

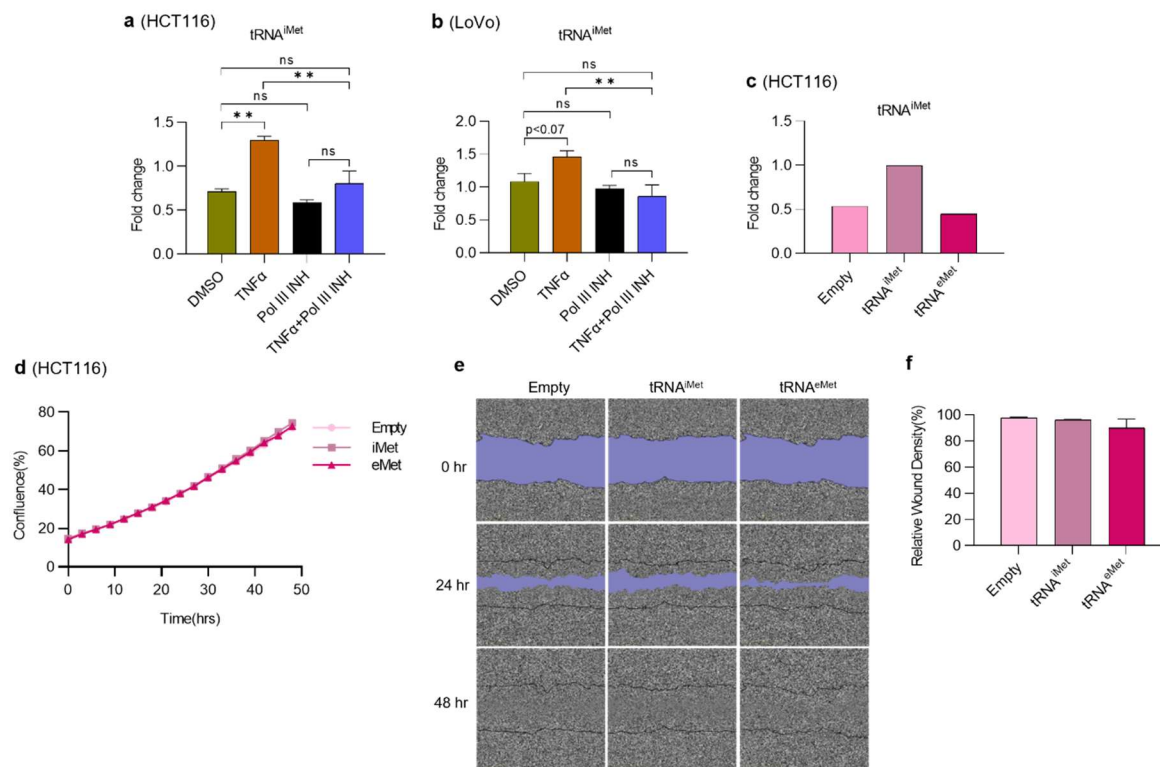

**Supplementary Figure S3. Overexpression of initiator methionine tRNA does not contribute to the increased proliferation and migration of CRC cells.** (a) HCT116 and (b) LoVo cells were treated with 0.1% DMSO (control), 20 ng/ml of TNF $\alpha$ , 30  $\mu$ M of RNA polymerase III inhibitor, ML-60218 or both TNF $\alpha$  and ML-60218 for 24 hours. Total RNA was isolated from the cells, and the levels of initiator methionine tRNA (tRNA<sup>iMet</sup>) were assessed using RT-qPCR. RNA levels were normalised to the geometric mean of *GAPDH* and *RPLP0* mRNA levels. N=3. (c, d, e, f) HCT116 cells were stably overexpressing tRNA<sup>iMet</sup>, elongator tRNA (tRNA<sup>eMet</sup>) or harbouring empty vector as a control (Empty). (c) Total RNA was isolated from cells, and the levels of tRNA<sup>iMet</sup> were assessed using RT-qPCR. RNA levels were normalised to the geometric mean of *GAPDH* and *RPLP0* mRNA levels. (d) Proliferation assay. The cells were seeded in a 96-well plate and their confluency was monitored every 3 h for 48 h using the IncuCyte Live-Cell imaging system. Error bars were omitted for the sake of figure clarity. (e) Scratch-wound assay. The cells were seeded in 96-well plates and grown in a 2% serum medium overnight. Then wounds were created and their closure was monitored using the IncuCyte Live-Cell imaging system. Images of the cells were captured every 3 hours for 48 h. (f) Quantification of the relative wound density at 48 h. Error bars represent the standard deviation. Statistical analysis was performed using one-way ANOVA followed by the *post-hoc* Tukey test. \* p-value < 0.05; \*\* p-value < 0.01; \*\*\* p-value < 0.001; n.s. non-significant.
