# Supplementary material for: Inhibition of RNA Polymerase III Augments the Anti-Cancer Properties of TNFα
Source: MDPI journal article supplement (doi:10.3390/cancers15051495), 2023-02-27
Supplement: s1 [file s1]

## Supplementary Figure S2

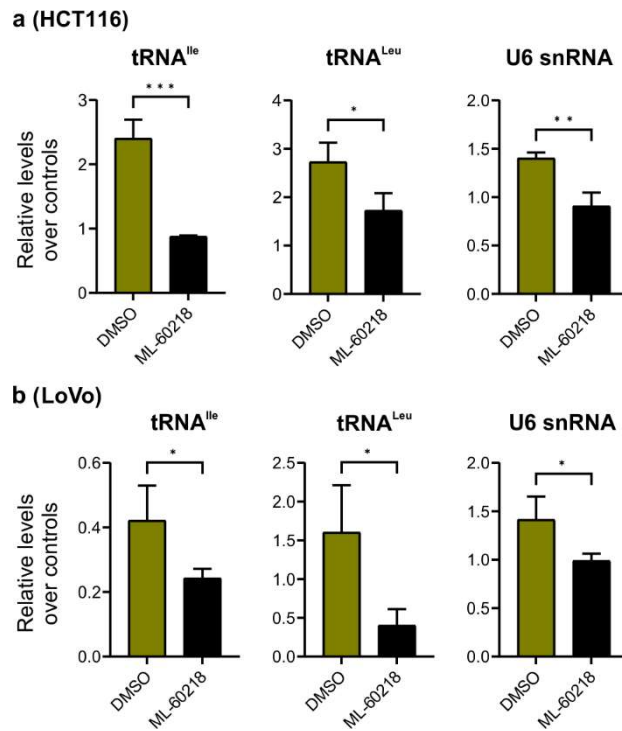

**Supplementary Figure S2. ML-60218 inhibitor downregulates Pol III activity in colorectal cancer cells.** (a) HCT116 and (b) LoVo cells were treated either with 0.1% DMSO (control) or 30  $\mu$ M of RNA polymerase III inhibitor ML-60218 for 24 hours. Total RNA was isolated from the cells, and the levels of indicated transcripts were assessed using RT-qPCR. RNA levels were normalised to the geometric mean of *GAPDH* and *RPLP0* mRNA levels. N=3. Error bars represent standard deviation. Statistical analysis was performed using an unpaired t-test. \* p-value < 0.05; \*\* p-value < 0.01; \*\*\* p-value < 0.001.
