# Supplementary material for: Inhibition of RNA Polymerase III Augments the Anti-Cancer Properties of TNFα
Source: MDPI journal article supplement (doi:10.3390/cancers15051495), 2023-02-27

# **Inhibition of RNA polymerase III augments the anti-cancer properties of TNF $\alpha$**

Hitha Gopalan Nair<sup>1</sup>, Aneta Jurkiewicz<sup>1</sup>, Damian Graczyk<sup>1#</sup>

<sup>1</sup>Institute of Biochemistry and Biophysics of the Polish Academy of Sciences, ul. Pawińskiego 5a, 02-106 Warsaw, Poland

**Supplementary Figures S1 - Original Images for Blots**

Figure 2

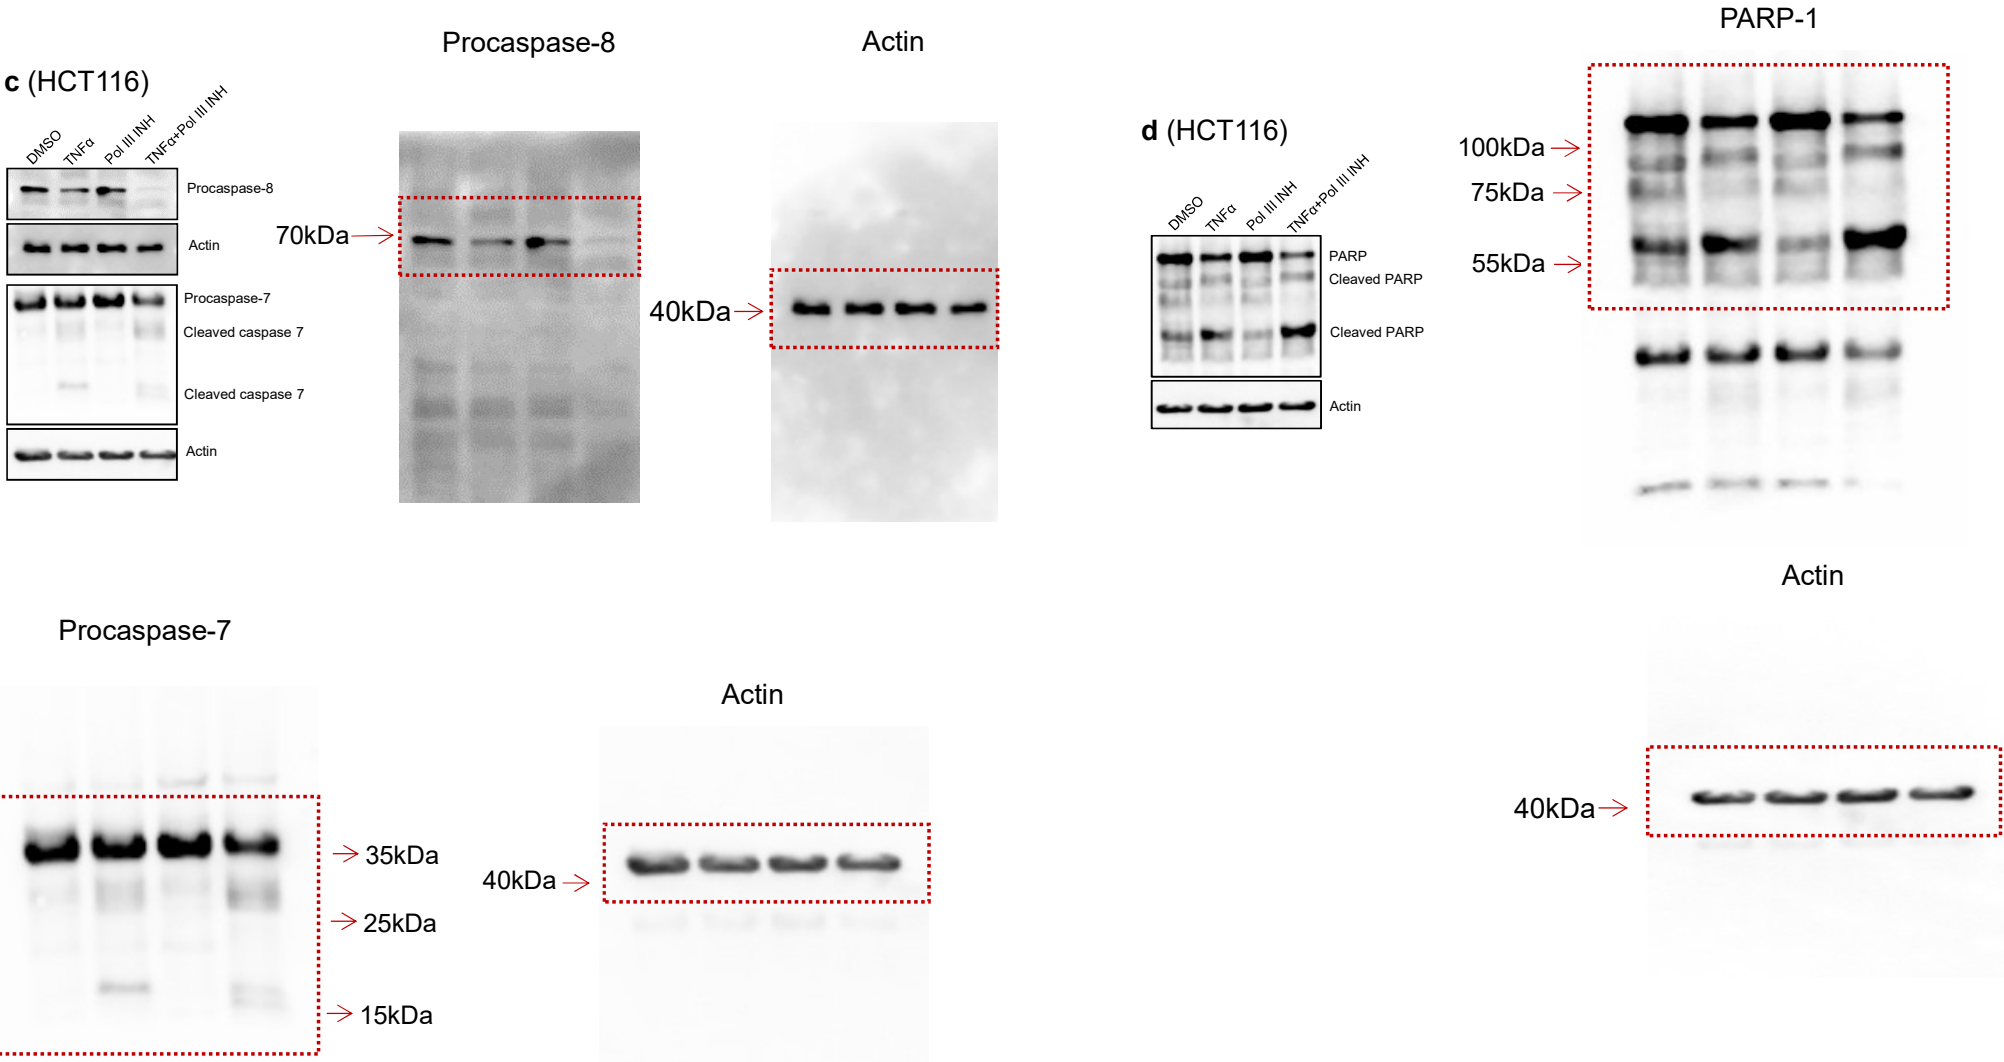

Figure 3

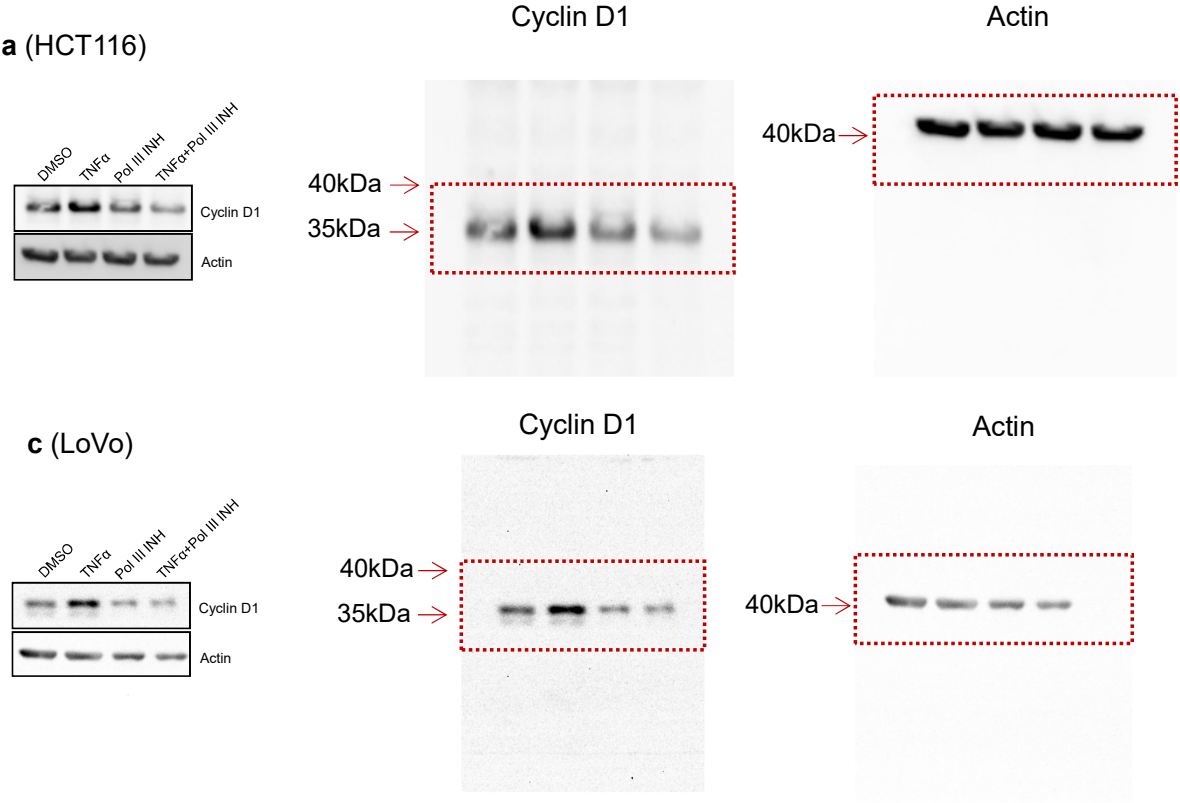

Figure 5

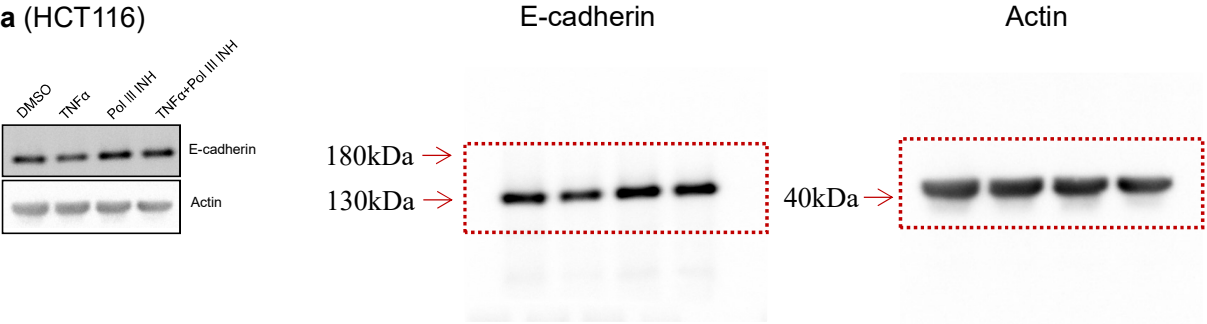

Figure 6

**a (HCT116)**

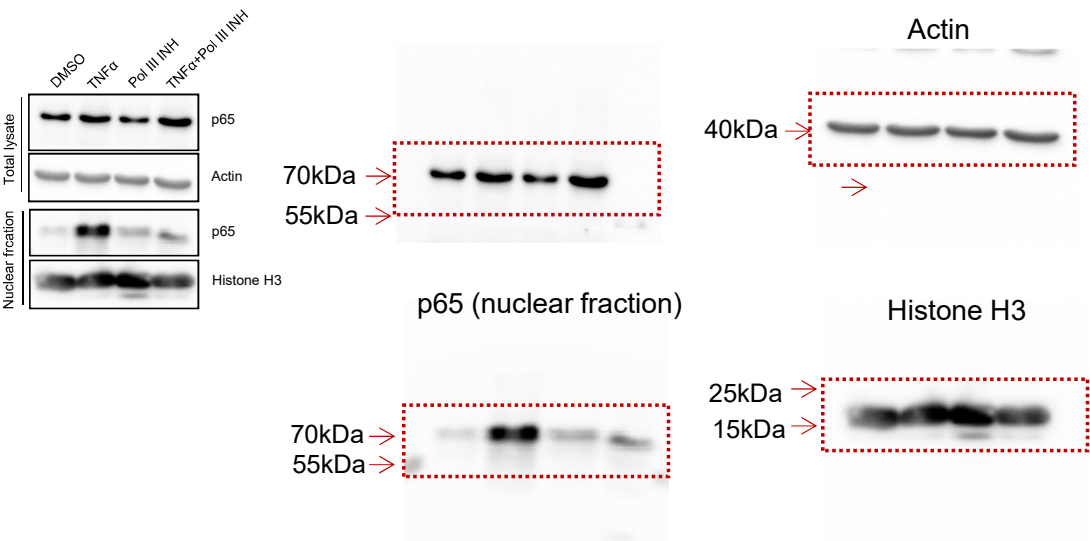

**f**

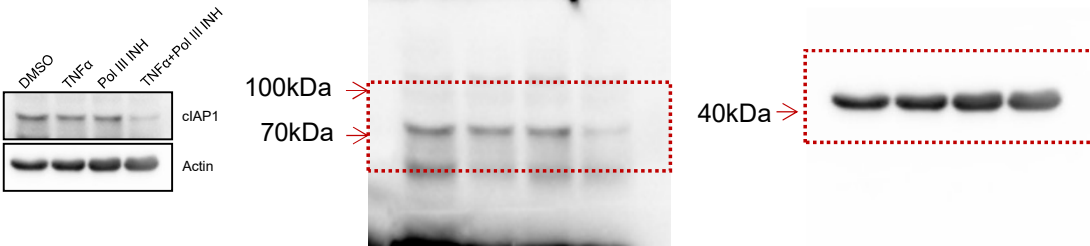

**d (LoVo)**

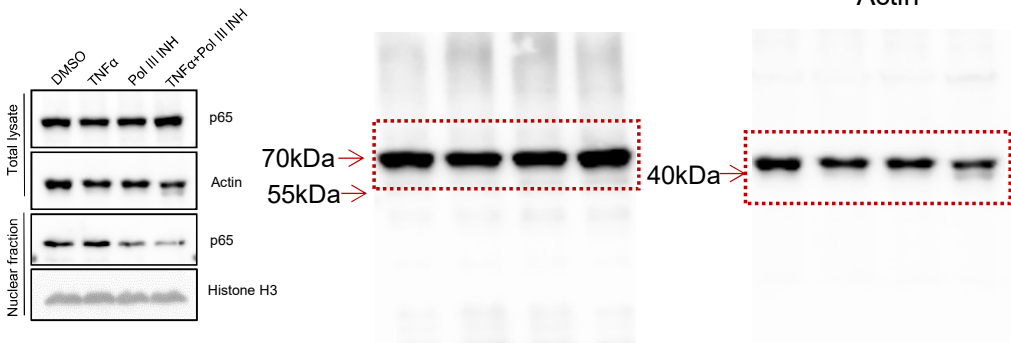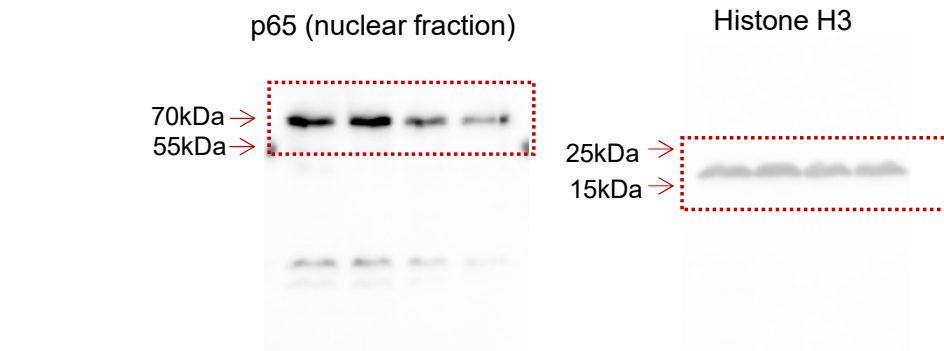

Supplement: s1 [file s1]
